# Supplementary material for: Seasonal asthma in Melbourne, Australia, and some observations on the occurrence of thunderstorm asthma and its predictability
Source: PLOS journal article supplement (doi:10.1371/journal.pone.0194929), 2018-04-12

Residuals normalised by running mean and SD

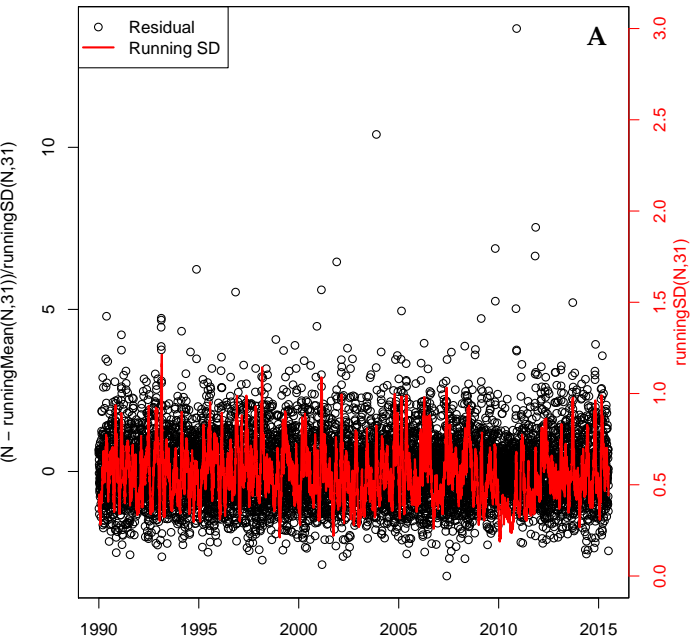

Residuals normalised by annual mean and SD

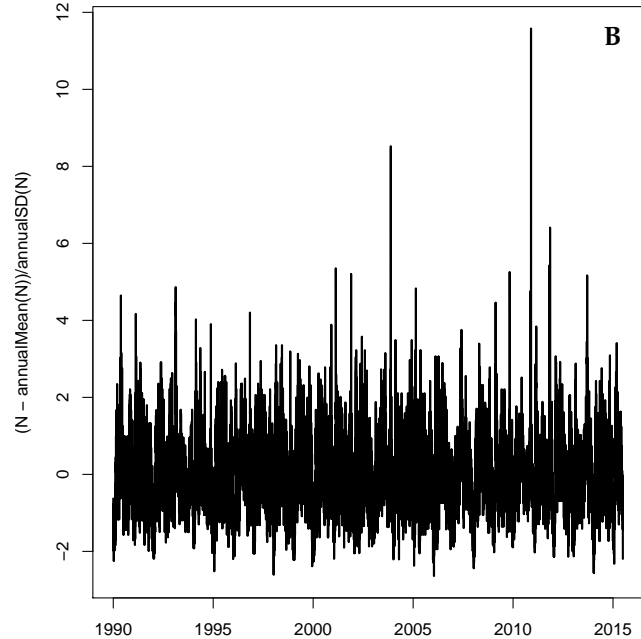

Population-normalised admissions, minus seasonal component

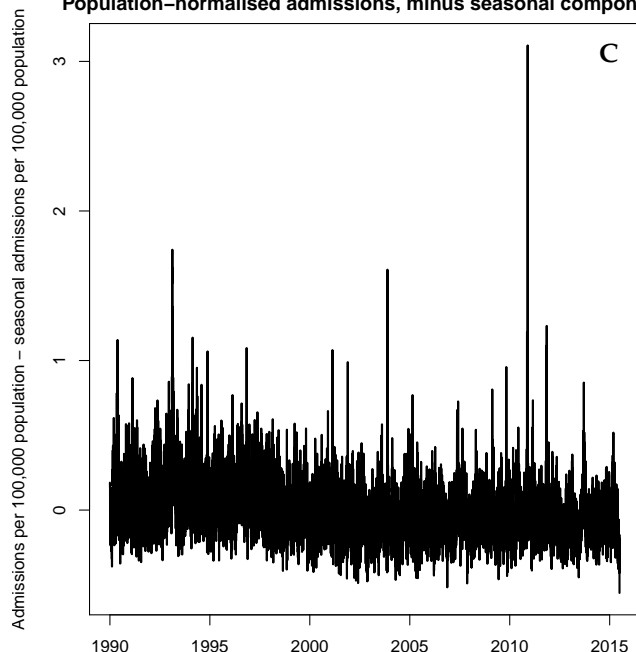

Supplement: S5 (10.1371/journal.pone.0194929.s005) [file journal.pone.0194929.s005]
